# Supplementary material
Source: Springer Nature journal article supplement (https://www.springermedizin.de/resource/supplementary/12877_2012_809_MOESM2_ESM.pdf/9440622)
Supplement: MOESM2 [file 9440622]

# 月 テイ ク テン **TAKE10!**® Calendar

● 毎日の記録をしてみましょう。

- 運動したら  マークに○印をつけましょう (例 )
- 食生活チェックは何点でしたか? (例  8 点)

あなたの **TAKE10!**® (ウォーキング、毎日牛乳を飲む、その他なんでも)

| 日                                                                                                                                                                         | 月                                                                                                                                                                         | 火                                                                                                                                                                         | 水                                                                                                                                                                             | 木                                                                                                                                                                             | 金                                                                                                                                                                             | 土                                                                                                                                                                             |
|---------------------------------------------------------------------------------------------------------------------------------------------------------------------------|---------------------------------------------------------------------------------------------------------------------------------------------------------------------------|---------------------------------------------------------------------------------------------------------------------------------------------------------------------------|-------------------------------------------------------------------------------------------------------------------------------------------------------------------------------|-------------------------------------------------------------------------------------------------------------------------------------------------------------------------------|-------------------------------------------------------------------------------------------------------------------------------------------------------------------------------|-------------------------------------------------------------------------------------------------------------------------------------------------------------------------------|
|   点     |   点     |   点     |   点     |   点     |   点     |   点     |
|   点     |   点     |   点     |   点     |   点     |   点     |   点     |
|   点   |   点   |   点   |   点   |   点   |   点   |   点   |
|   点 |   点 |   点 |   点 |   点 |   点 |   点 |
|   点 |   点 |   点 |   点 |   点 |   点 |   点 |
